# Supplementary material for: Transcription reinitiation by recycling RNA polymerase that diffuses on DNA after releasing terminated RNA
Source: PubMed Central journal article supplement (PMC6978380; doi:10.1038/s41467-019-14200-3), 2020-01-23

Supplementary Information

**Transcription reinitiation by recycling RNA polymerase that diffuses on DNA after releasing terminated RNA**

W. Kang et al.

## Supplementary Tables

**Supplementary Table 1 Termination properties of tR2 on various templates**

| DNA template                 | Termination efficiency (%) | Termination timing <sup>a</sup> (s) | PIFE <sup>b</sup> occurrence (%) | PIFE <sup>b</sup> start timing <sup>c</sup> (s) | The # of molecules analyzed ( <i>n</i> ) in replicated experiments |
|------------------------------|----------------------------|-------------------------------------|----------------------------------|-------------------------------------------------|--------------------------------------------------------------------|
| L+15                         | 33 ± 4                     | 6.1 ± 0.9                           | 91 ± 5                           | 0.6 ± 0.2                                       | 818 = 283 + 168 + 128 + 141 + 98                                   |
| L+15 + lab RNAP <sup>d</sup> | 38 ± 7                     | 4.7 ± 0.4                           | 95 ± 6                           | 1.6 ± 1.1                                       | 230 = 37 + 114 + 79                                                |
| L+62                         | 31 ± 3                     | 3.8 ± 0.5                           | 91 ± 6                           | 1.5 ± 0.5                                       | 217 = 86 + 78 + 53                                                 |
| L+112                        | 41 ± 5                     | 5.9 ± 0.8                           | 89 ± 2                           | 6.1 ± 2.4                                       | 183 = 21 + 21 + 77 + 64                                            |
| L+112 + E111Q                | -                          | 4.9 ± 0.7                           | 25 ± 7                           | 20.7 ± 19.0                                     | 37 = 5 + 14 + 18                                                   |
| L+112R                       | -                          | 7.1 ± 1.3                           | 81 ± 5                           | 9.9 ± 4.1                                       | 64 = 17 + 13 + 19 + 15                                             |
| L+112R + E111Q               | -                          | 6.2 ± 1.6                           | 84 ± 5                           | 7.7 ± 2.3                                       | 30 = 9 + 11 + 10                                                   |
| L+212                        | 34 ± 1                     | 4.0 ± 0.9                           | 73 ± 8                           | 9.6 ± 3.7                                       | 134 = 43 + 35 + 23 + 19 + 14                                       |
| L+312                        | 38 ± 1                     | 5.2 ± 1.3                           | 71 ± 6                           | 14.8 ± 9.5                                      | 90 = 23 + 41 + 26                                                  |
| L+512                        | 36 ± 3                     | 4.2 ± 0.9                           | 47 ± 9                           | 24.6 ± 8.9                                      | 404 = 100 + 58 + 75 + 101 + 70                                     |
| T257/L+15                    | 36 ± 4                     | 25.0 ± 6.6                          | 86 ± 2                           | 3.6 ± 1.9                                       | 144 = 50 + 43 + 30 + 21                                            |
| L+15M                        | none                       | -                                   | none                             | -                                               | 23                                                                 |

<sup>a</sup> Timing of RNA release (termination) at TS measured since NTP injection

<sup>b</sup> Cy5 PIFE made by post-terminational RNAP

<sup>c</sup> Timing of Cy5 PIFE start measured since RNA release (termination)

<sup>d</sup> Using extensively lab-purified RNAP instead of RNAP purchased from New England Biolabs

**Supplementary Table 2 Termination properties of L+15 tR2 with factors**

| Transcription factor | Termination efficiency (%) | Termination timing <sup>a</sup> (s) | PIFE <sup>b</sup> occurrence (%) | PIFE start timing <sup>c</sup> (s) | <i>n</i> in replicated experiments |
|----------------------|----------------------------|-------------------------------------|----------------------------------|------------------------------------|------------------------------------|
| NusA                 | 58 ± 10                    | 7.9 ± 0.2                           | 86 ± 6                           | 1.0 ± 0.1                          | 236 = 86 + 78 + 72                 |
| NusG                 | 35 ± 3                     | 4.1 ± 0.2                           | 90 ± 11                          | 1.5 ± 0.5                          | 279 = 61 + 69 + 57 + 59 + 43       |
| NusA + NusG          | 58 ± 4                     | 7.0 ± 0.8                           | 87 ± 3                           | 0.7 ± 1.2                          | 223 = 93 + 69 + 61                 |

<sup>a</sup> Timing of RNA release (termination) at TS measured since NTP injection

<sup>b</sup> Cy5 PIFE made by post-terminational RNAP

<sup>c</sup> Timing of Cy5 PIFE start measured since RNA release (termination)

**Supplementary Table 3 Reinitiation measured with two-unit or one-unit template**

| DNA template             | Termination timing (s) | Type 1/2/3 (%)               | Probing efficiency (%) | Reinitiation efficiency (%) | <i>n</i> in replicated experiments |
|--------------------------|------------------------|------------------------------|------------------------|-----------------------------|------------------------------------|
| Two-unit                 | 5.9 ± 1.3              | 9.5±2.7/39.7±10.6/50.8±9.4   | 51.8 <sup>a</sup>      | 37.2 <sup>c</sup>           | 85=19+16+19+11+20                  |
| Two-unit + $\sigma^{70}$ | 6.2 ± 1.3              | 14.1±7.3/35.0±11.8/50.9±10.1 | 52.0 <sup>a</sup>      | 55.1 <sup>c</sup>           | 86=25+25+36                        |
| Two-unit + E111Q         | 6.0 ± 2.3              | 5.6±4.9/52.5±6.5/41.9±8.8    | not available          | 18.6 <sup>c</sup>           | 59=20+19+20                        |
| One-unit + $\sigma^{70}$ | 7.5 ± 0.8              | 4.9±1.4/37.8±2.7/ 57.3±3.9   | 26.6 <sup>b</sup>      | 42.9                        | 122=35+32+32+23                    |

<sup>a</sup> Calculated using the TS-termination efficiency of 33.4% (± 4.5%)

<sup>b</sup> Calculated using the TS-termination efficiency of 16.5% (± 0.9%)

<sup>c</sup> Reinitiation occurring on the downstream promoter

### Supplementary Table 4 Template DNA sequences

| Oligo name                   | Sequence (5' → 3')                                                                                                                                                                                                                                        |
|------------------------------|-----------------------------------------------------------------------------------------------------------------------------------------------------------------------------------------------------------------------------------------------------------|
| UP8_template                 | TATCA AAAAG AGTAT TGA CT TAAAG TCTAA CCTAT AGGAT ACTTA CAGCC ATCGA<br>ACAGG CCTGC TGGTA ATCGC AGGCC TTTT ATTTG GGGGA GAGGG AAGTC ATGAA<br>AAAAC TAACC TTTGA AATTC GATCT CCAGG ATCCA CCACC                                                                 |
| UP8M_template                | TATCA AAAAG AGTAT TGA CT TAAAG TCTAA CCTAT AGGAT ACTTA CAGCC ATGGC CTGCT<br>GGTGA CTGAC TGA CT GACT GACT G AC                                                                                                                                             |
| t500_template                | TATCA AAAAG AGTAT TGA CT TAAAG TCTAA CCTAT AGGAT ACTTA CAGCC ATCCC AAAGC<br>CCGCC GAAAG GCGGG CTTTT CTGTT TCTGG GCGGT GAAGT CATGA AAAAA CTAAC CTTTG<br>AAATT CGATC TCCAG GATCC ACCAC C                                                                    |
| his_template                 | TATCA AAAAG AGTAT TGA CT TAAAG TCTAA CCTAT AGGAT ACTTA CAGCC ATCCG AAAGC<br>CCCCG GAAGA UGCAU CUUCC GGGGG CUUUU UUUUU TGGGC GGTGA AGTCA TGAAA<br>AAACT AACCT TTGAA ATTCG ATCTC CAGGA TCCAC CACC                                                           |
| UP8_template_2               | GCGAG ATTAC CATT A AGTGA ATTCG AAAAA AGCAC GCTAC CGCCC CAGGC GGTGG<br>TGGAT CCTGG AGATC GAATT TCAAA GGTTA GTTTT TTCAT GACTT CCCTC TCCCC CAAAT<br>AAAAA GGCCT GCGAT TACCA GCAGG CCTGT TCGAT GGCTG TAAGT ATCCT ATAGG<br>TTAGA CTTTA AGTCA ATACT CTTTT TGATA |
| additional_part              | pAATTC TTACA ATTTA GACCC TAATA TCACA TCAGA CACTA ATTGC CTCTG CCAAA ATTCT<br>GTCCA CAAGC GTTTT AGTTC GCCCC AGTAA AGTTG TCAAT AACGA CCACC AAATC CGCAT<br>GTTAC GGGAC TTCTT ATTA TTCTT TTTTC GTGGG GAGCA GCGGA TCTTA ATGGA TGGCG<br>CCAGG TGGTA TGGAA GC     |
| additional_part_2            | pGGGCT GAAAG TAGCG CCGGG TAAGG TACGC GCCTG GTATG GCAGG ACTAT GAAGC<br>CAATA CAAAG GCTAC ATCT CACT GGGTG GACGG AACG CAGAA TTATG GTTAC<br>TTTTT GGATA CGTGA AACAT GTCCC ATGGT AGCCC AAAGA CTTGG GAGTC TATCA CCCCT<br>AGGAC ACACA AGACA CCACA AGCTT AGACC    |
| DNA_splint                   | TGTGA TATTA GGGTC TAAAT TGTA GAATT GCGAG ATTAC CATT A AGTGA ATTCG<br>AAAAA                                                                                                                                                                                |
| DNA_splint_2                 | GCGTA CCTTA CCCGG CGTA CTTTC AGCCC GCTTC CATA CACCT GCGC CATCC ATTAA                                                                                                                                                                                      |
| reinitiation_part_1B         | pTAATA TCACA TCATT AGACA CTTAT CAAAA AGAGT ATTGA CTAA AGTCT AACCT ATAGG<br>ATACT TACAG CTGC AGACA CCACA GACCA CACAC AAGAC ACCAC AGACC ACACA CAAGA<br>CACCA CAGAC CACAC ACAAG ACACC ACAGA CCACA CACAA GACAC CACAG ACCAC<br>ACACA AGACA CCACA AGCTT AGACC   |
| DNA_splint_reinitiation      | AGTGT CTAAT GATGT GATAT TAGCG AGATT ACCAT TAAGT GAATT CGAAA AA                                                                                                                                                                                            |
| T257/L+15_template_1         | TATCA AAAAG AGTAT TGA CT TAAAG TCTAA CCTAT AGGAT ACTTA CAGCC ATCGA ACAGG<br>CCTCA AACAA AAGAA TGGAA TCAAA GTTAA CTTCA AAATT AGACA CAACA TTGAA GATGG<br>AAGCG TTCAA CTAGC AGACC ATTAT CAACA AAATA CTCCA ATTGG CGATG GCCCT GTCCT<br>TTTAC CAGAC AACCA TTACC |
| T257/L+15_template_2         | TTTAC CAGAC AACCA TTACC TGTCC ACACA ATCTG CCCTT TCGAA AGATC CCAAC GAAAA<br>GAGAG ACCAC ATGGT CCTTC TTGAG TTTGT AACAA CAGGC CTGCT GGTA TCGCA GGCCT<br>TTTTA TTTGG GGGAG AGGGA AG                                                                           |
| Original_reinitiation_1      | TATCA AAAAG AGTAT TGA CT TAAAG TCTAA CCTAT AGGAT ACTTA CAGCC ATCGA ACAGG<br>CCTAG ACACC ACAGA CCACA CACAA GACAC CACAG ACCAC ACACA AGACA CCACA GACCA<br>CACAC AAGAC ACCAC AGACC ACACA CAAGA CACCA CAGAC CACAC ACAGC AGGAT<br>TAAGA AGCCA ATACA AAGGC TAC   |
| Original_reinitiation_2      | pATCCT CACTC GGCAG AUAUG ACAAU ACAGA GGCCT GCTGG TAATC GCAGG CCTTT<br>TTATT ACACA CAAGA CACCA CAAGC TTAGA CC                                                                                                                                              |
| Original_reinitiation_splint | TCTGT ATTGT CATAT CTGCC GAGTG AGGAT GTAGC CTTTG TATTG GCTTC TTAAT CCTGC                                                                                                                                                                                   |

### Supplementary Table 5 Primer sequences

| Oligo name               | Sequence (5' → 3')                                    |
|--------------------------|-------------------------------------------------------|
| forward_primer_biotin    | Biotin-TATCA AAAAG AGTAT TGA CT TAAAG TC              |
| reverse_primer_biotin    | Biotin-GCGAG ATTAC CATT A AGTGA A                     |
| forward_primer_Cy5       | Cy5-TATCA AAAAG AGTAT TGA CT TAAAG TC                 |
| reverse_primer_L+15      | Cy5-CTTC CTCTC CCCCA AATAA AAAG                       |
| reverse_primer_L+15M     | Cy5-GTCAG TCAGT CAGTC AGTCA CCAGC AG                  |
| reverse_primer_L+62      | Cy5-GGTGG TGGAT CCTGG AGATC G                         |
| reverse_primer_L+112     | Cy5-GCGAG ATTAC CATT A AGTGA A                        |
| reverse_primer_L+212     | Cy5-GACAA CTTTA CTGGG GCGAA CTAAC AC                  |
| reverse_primer_L+312     | Cy5-GCTTC CATA CACCT GCGC CATCC AT                    |
| reverse_primer_L+512     | Cy5-GGTCT AAGCT TGTGG TGTCT TGTGT GT                  |
| lambda_forward_primer    | GTTTT CTGGG TTGGT                                     |
| lambda_reverse_primer    | GGCGG GTTTT GTTTT                                     |
| forward_primer_extension | ACTAT CTATT CTCCC ATCTA TCAAA AAGAG TATTG ACTTA AAGTC |
| forward_primer_biotin_α  | Biotin-ACTAT CTATT CTCCC ATC                          |

## Supplementary Methods

DNA template L+15 was prepared using UP8\_template, forward\_primer\_biotin, and reverse\_primer\_L+15; L+15M prepared using UP8M\_template, forward\_primer\_biotin, and reverse\_primer\_L+15M; L+62 prepared using UP8\_template, forward\_primer\_biotin, and reverse\_primer\_L+62; L+112 prepared using UP8\_template\_2, forward\_primer\_biotin, and reverse\_primer\_L+112; and L+112R prepared using UP8\_template\_2, forward\_primer\_Cy5' and reverse\_primer\_biotin.

Template for T257/L+15 was prepared using T257/L+15\_template\_1, T257/L+15\_template\_2, forward\_primer\_biotin, and reverse\_primer\_L+512. Template for phage  $\phi$ 82 t500 terminator was prepared using t500\_template, forward\_primer\_biotin, and reverse\_primer\_L+62; and template for *E. coli his* operon attenuator using his\_template, forward\_primer\_biotin, and reverse\_primer\_L+62.

For L+212 and L+312 constructions, L+112 and additional\_part\_1 were annealed with DNA\_splint\_1 by cooling from 90°C to 30°C for 120 min in the annealing buffer (10 mM Tris-HCl, pH 8.0, with 50 mM NaCl), ligated using T4 DNA ligase 2 purchased from NEB, and used for amplification reactions. L+212 was prepared using forward\_primer\_biotin and reverse\_primer\_L+212; L+312 using forward\_primer\_biotin and reverse\_primer\_L+312. For L+512 construction, L+312 and additional\_part\_2 were annealed with DNA\_splint\_2 and the same ligation reaction was repeated. L+512 was prepared using forward\_primer\_biotin and reverse\_primer\_L+512.

For reinitiation detection and  $\sigma$  retention time estimation, long\_tail template with a HindIII recognition sequence was prepared using lambda DNA (NEB), lambda\_forward\_primer, and lambda\_reverse\_primer. To construct the upstream part of reinitiation template, L+112\_α was prepared with UP8\_template\_2, forward\_primer\_extension, and reverse\_primer\_L+112. L+112\_α and reinitiation\_part\_1B were annealed with DNA\_splint\_reinitiation by cooling from 90 to 30 °C for 120 min in the annealing buffer and the same ligation. To construct the upstream part of original reinitiation template, Original\_reinitiation\_1 and Original\_reinitiation\_2 were annealed with Original\_reinitiation\_splint by cooling from 90°C to 30°C for 120 min in the annealing buffer and the same ligation. Long\_tail DNA, the upstream part of reinitiation template, and L+512 were each digested with HindIII (NEB) for one h at 37 °C in the CutSmart™ buffer (NEB). After that, HindIII was deactivated for 20 min at 80 °C.

Long\_tail DNA were annealed with cleaved L+512 or the upstream part of reinitiation template by the same protocol as above and used for amplification reaction. L+lambda was prepared using forward\_primer\_biotin and lambda\_forward\_primer. DNA template for reinitiation detection was prepared using forward\_primer\_biotin\_α and lambda\_reverse\_primer. The DNA template for probing the reinitiation at the original promoter was prepared using forward\_primer\_biotin\_α and lambda\_reverse\_primer.

## Supplementary Figures

**Supplementary Fig. 1** RNAP-DNA complex duration at the DNA end after RNA release. We measured Cy5 PIFE survival time after the RNA release ( $n = 120$ ), and the distribution was fitted to a single exponential function to obtain the RNAP's retention time of  $536 \pm 83$  s.

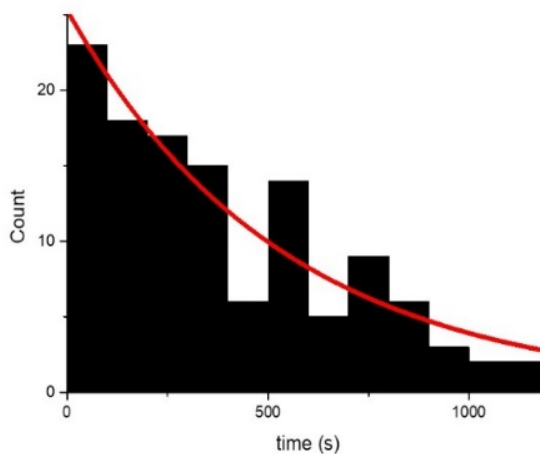

**Supplementary Fig. 2** Cy5 photobleaching time. To measure Cy5 survival time, we performed single-molecule imaging without NTP injection ( $n = 122$ ). About 60% of the molecules survived for longer than 1200 s after single-molecule imaging started, from which the photobleaching time of Cy5 was estimated as 2350 s.

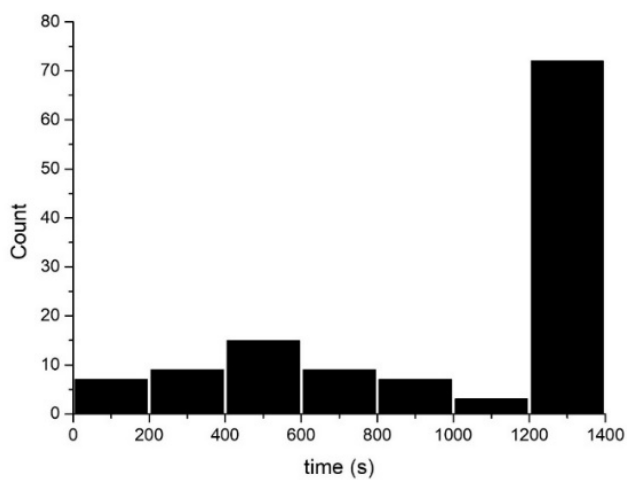

**Supplementary Fig. 3** Sigma retention. We estimated the percentage of transcription complex containing  $\sigma^{70}$  by comparing the number of Cy3-Cy5 colocalized spots between the cases of Cy5-end of DNA and those of Cy5- $\sigma$ . The Cy5 labeling efficiencies of DNA (99%) and  $\sigma^{70}$  (105%) were similar. When Cy5 was labeled at the DNA end,  $46 \pm 10\%$  of Cy3 signal was colocalized with Cy5. When Cy5 was labeled on  $\sigma^{70}$ ,  $35 \pm 6\%$  of Cy3 signal was colocalized with Cy5. In the figures, the green circles, red dots, and black dots indicate all Cy3 spots identified, Cy3 spots colocalized with Cy5 signal, and the Cy3 spots non-colocalized with Cy5 signal, respectively. From these results, we estimated that 75% (34.5 / 45.8) of elongation complex has  $\sigma^{70}$ .

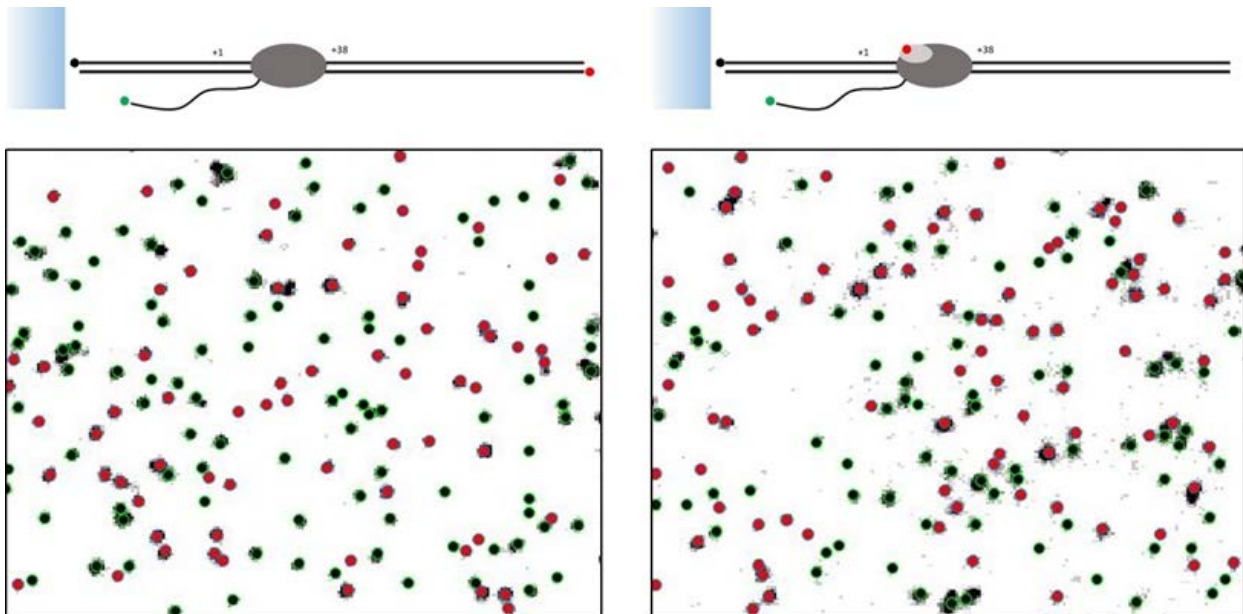

**Supplementary Fig. 4** Sigma factor lasting time at the DNA end after RNA release. We measured Cy5 signal vanishing time after NTP addition in termination complexes of Fig. 1F template ( $n = 26$ ).

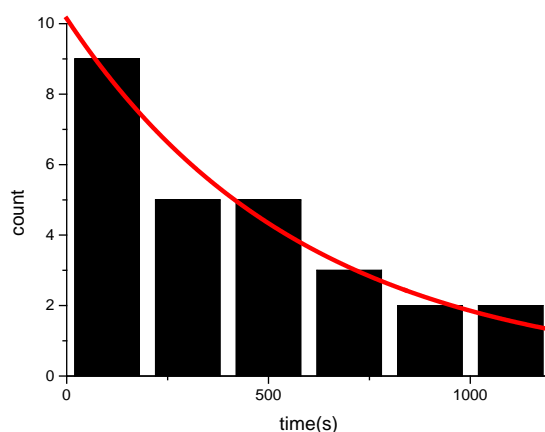

**Supplementary Fig. 5** EcoRI E111Q inhibits the cleavage of DNA by EcoRI. Using the L+112 DNA template labeled with Cy5, we measured the cleavage inhibition efficiency of 1 nM E111Q. We counted the number of Cy5 spots before (left) and at 10 min after wild-type EcoRI injection (right) without (top) and with E111Q incubation for 5 min (bottom) before starting the imaging. The number of spots was decreased by  $86 \pm 2\%$  without E111Q incubation. On the other hand, the number was decreased by  $26 \pm 4\%$  with E111Q incubation. From these data, we estimated the cleavage inhibition efficiency of E111Q as  $71 \pm 5\%$ .

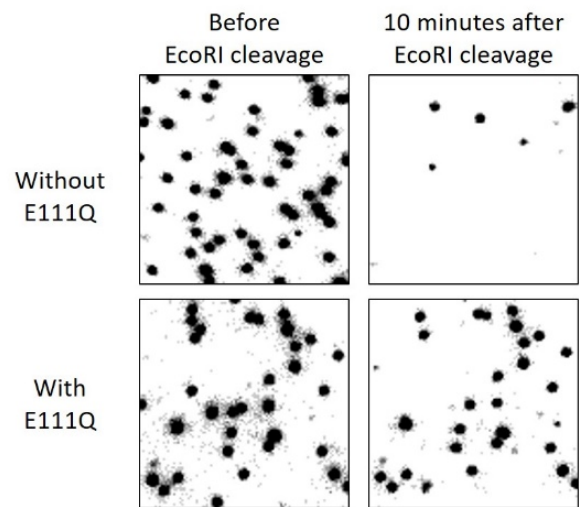

**Supplementary Fig. 6** Diffusion time of RNAP on a long DNA template. We prepared a transcription complex with Cy5-labeled  $\sigma^{70}$  on a 1560-bp DNA template (L+lambda), and measured the Cy5 signal vanishing time after termination ( $n = 30$ ).

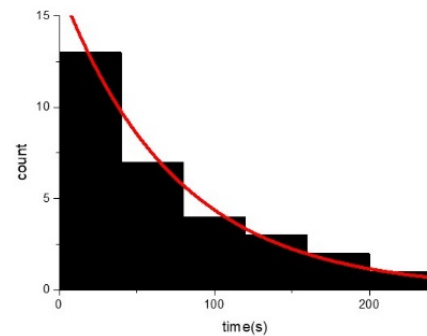

**Supplementary Fig. 7** Termination time of various templates. We measured the Cy3 signal vanishing time after NTP addition for L+15 ( $n = 270$ , **a**), L+62 ( $n = 52$ , **b**), L+112 ( $n = 50$ , **c**), L+112R ( $n = 51$ , **d**), L+212 ( $n = 21$ , **e**), L+312 ( $n = 24$ , **f**), L+512 ( $n = 133$ , **g**), L+112 with E111Q ( $n = 46$ , **h**), and L+112R with E111Q ( $n = 30$ , **i**). The distributions were fitted to a single-exponential decay function, and the fitted decay times are summarized in Supplementary Table S1.

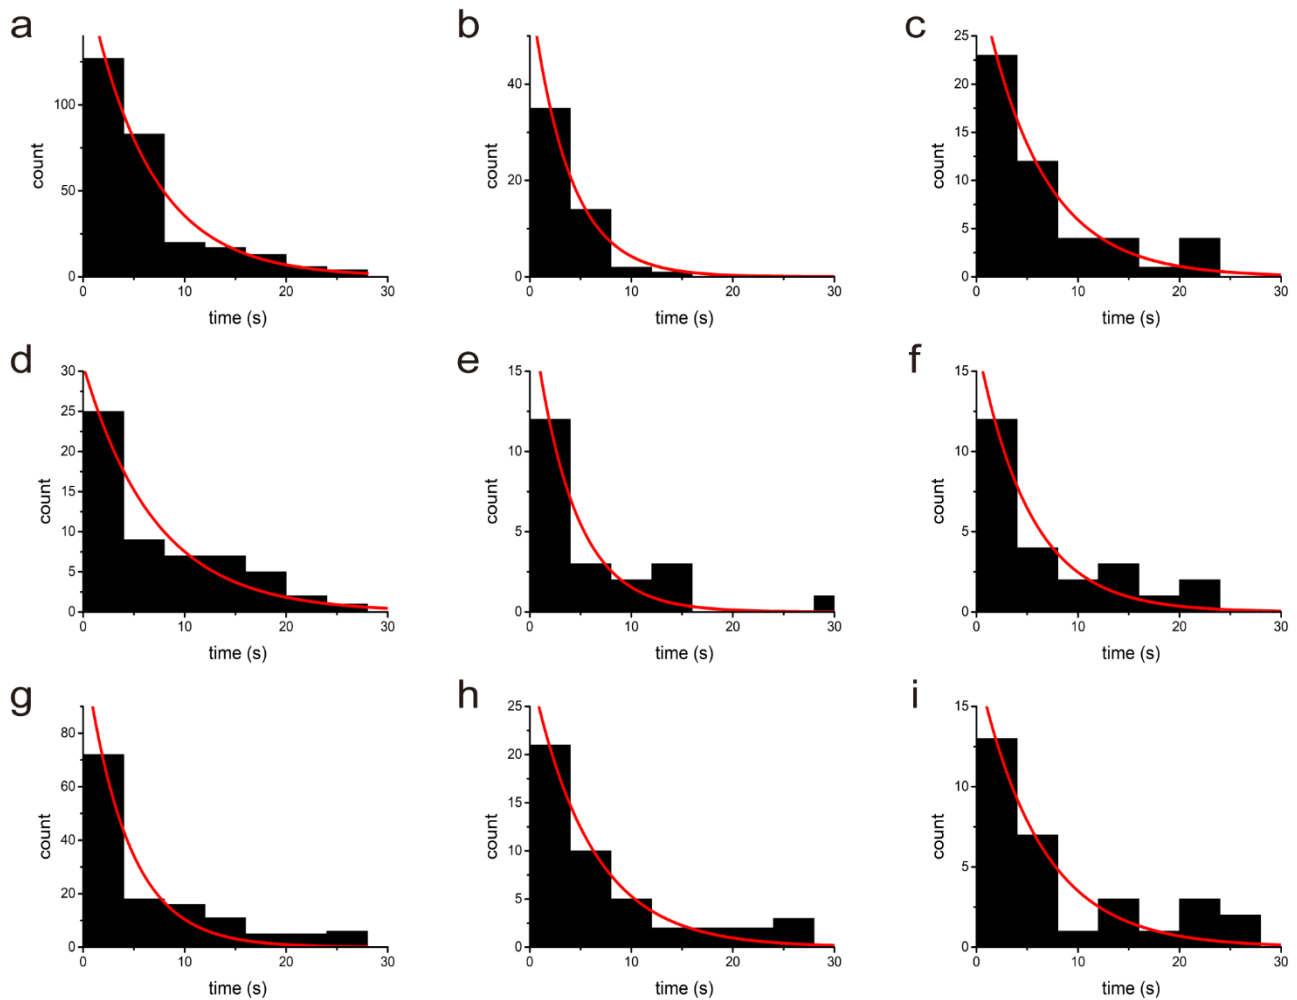



**Supplementary Fig. 8** Salt dependency of post-terminational RNAP retention. The Cy5-PIFE occurrence with L+15 template was measured at varying concentrations of NaCl (from 20 to 600 mM) but at fixed 2 mM MgCl<sub>2</sub> (red circulars). It was also measured at 20 mM NaCl and 20 mM MgCl<sub>2</sub> (black square).

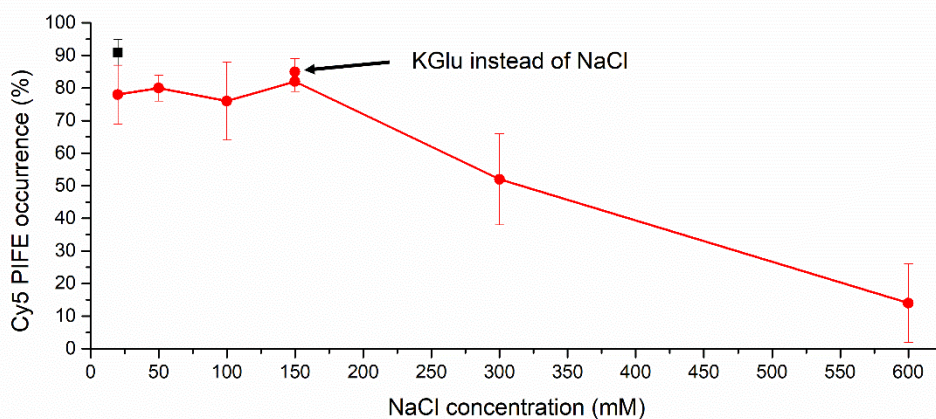

| Salt (plus 2 mM MgCl <sub>2</sub> ) | Termination efficiency (%) | PIFE occurrence (%) | The # of molecules analyzed ( <i>n</i> ) in replicated experiments |
|-------------------------------------|----------------------------|---------------------|--------------------------------------------------------------------|
| NaCl 20 mM                          | 55 ± 14                    | 78 ± 9              | 117 = 13 + 31 + 73                                                 |
| NaCl 50 mM                          | 47 ± 4                     | 81 ± 5              | 122 = 38 + 23 + 14 + 47                                            |
| NaCl 100 mM                         | 44 ± 10                    | 76 ± 12             | 122 = 37 + 37 + 48                                                 |
| NaCl 150 mM                         | 44 ± 7                     | 82 ± 3              | 286 = 30 + 70 + 61 + 67 + 58                                       |
| NaCl 300 mM                         | 43 ± 8                     | 52 ± 14             | 98 = 14 + 25 + 19 + 13 + 27                                        |
| NaCl 600 mM                         | 43 ± 6                     | 14 ± 12             | 48 = 10 + 16 + 22                                                  |
| Kglu 150 mM                         | 51 ± 4                     | 86 ± 4              | 54 = 15 + 19 + 20                                                  |

**Supplementary Fig. 9** RNAP one-dimensional diffusion model. RNAP diffusion is simplified by one-dimensional diffusion with one reflecting end and another absorbing end. TS, termination site.

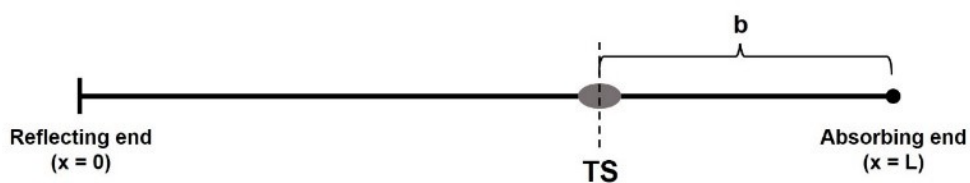

Supplement: 41467_2019_14200_MOESM1_ESM.pdf [file 41467_2019_14200_MOESM1_ESM.pdf]
